# 1 **Health care workers' self-perceived infection risk and** 2 **COVID-19 vaccine uptake: a mixed methods study**

3 Short title: Risk perception and COVID-19 vaccine uptake

4

5 Kasusu Nyamuryekung'e<sup>1\*</sup>, Maryam Amour<sup>2</sup>, Innocent Mboya<sup>3,4</sup>, Harrieth Ndumwa<sup>2</sup>, James  
6 Kengia<sup>5</sup>, Belinda J Njiro<sup>2</sup>, Lwidiko Mhamilawa<sup>6,11</sup>, Elizabeth Shayo<sup>7</sup>, Frida Ngalesoni<sup>8</sup>, Ntuli  
7 Kapologwe<sup>5</sup>, Albino Kalolo<sup>10</sup>, Emmy Metta<sup>12</sup>, Sia Msuya<sup>3,4,9</sup>

8

9 <sup>1</sup>Department of Community Dentistry, School of Dentistry, Muhimbili University of Health  
10 and Allied Sciences, P.O. Box 65001, Dar es Salaam, Tanzania.

11 <sup>2</sup>Department of Community Health, School of Public Health and Social Sciences, Muhimbili  
12 University of Health and Allied Sciences, P.O. Box 65001, Dar es Salaam, Tanzania.

13 <sup>3</sup>Department of Epidemiology and Biostatistics, Institute of Public Health, Kilimanjaro  
14 Christian Medical University College, P.O. Box 2240, Moshi, Tanzania

15 <sup>4</sup>Community Health Department, Institute of Public Health, Kilimanjaro Christian Medical  
16 University College, P.O. Box 2240, Moshi, Tanzania

17 <sup>5</sup>Presidents Office Regional Administration and Local Government, P.O. Box 1923, Dodoma,  
18 Tanzania

19 <sup>6</sup>Department of Parasitology and Medical Entomology, Muhimbili University of Health and  
20 Allied Sciences, P.O. Box 65001, Dar es Salaam, Tanzania

NOTE: This preprint reports new research that has not been certified by peer review and should not be used to guide clinical practice.

21 <sup>7</sup>National Institute for Medical Research, P.O. Box 9653, Dar es Salaam, Tanzania.

22 <sup>8</sup> AMREF Health Africa in Tanzania P.O. Box 2773, Dar es Salaam, Tanzania.

23 <sup>9</sup>Department of Community Medicine, Kilimanjaro Christian Medical Centre, P.O. Box 3010,  
24 Moshi, Tanzania

25 <sup>10</sup> Department of Public Health, St. Francis University College of Health and Allied Sciences  
26 P.O. Box 175, Morogoro, Tanzania.

27 <sup>11</sup> Department of Women's and Children's Health, International Maternal and Child Health  
28 (IMCH), Uppsala University, Uppsala, Sweden

29 <sup>12</sup>Department of Behavioral Sciences, School of Public Health and Social Sciences, Muhimbili  
30 University of Health and Allied Sciences, P.O. Box 65001, Dar es Salaam, Tanzania.

31

32 \*Corresponding author

33 E-mail: [kasusuklint@yahoo.com](mailto:kasusuklint@yahoo.com) (KKN)

34 Department of Community Dentistry, School of Dentistry, Muhimbili University of Health  
35 and Allied Sciences, P.O. Box 65001, Dar es Salaam, Tanzania

36

37

## 38 Abstract

39 **Background:** Vaccination is the most cost-effective way of preventing COVID-19 disease although  
40 there was a considerable delay in its institution in Tanzania. This study aimed to assess healthcare  
41 workers' (HCWs) self-perceived infection risk and uptake of COVID-19 vaccines.

42 **Methods:** A concurrent embedded, mixed methods research design was utilized to collect data among  
43 HCWs in seven Tanzanian regions. Quantitative data was collected using a validated, pre-piloted,  
44 interviewer administered questionnaire whereas in-depth interviews and focus group discussions  
45 gathered qualitative data. Descriptive analyses were performed, and chi-square test used to test for  
46 associations across categories. Thematic analysis was used to analyze the qualitative data.

47 **Results:** A total of 1,386 HCWs responded to the quantitative tool, 26 participated in the in-depth  
48 interviews and 74 in the focus-group discussions. About half of the HCW (53.6%) reported to have  
49 been vaccinated and three quarters (75.5%) self-perceived to be at a high risk of acquiring COVID-19  
50 infection. Participants perceived that the nature of their work and the working environment in the  
51 health facilities increases their risk to infection. Limited availability and use of personal protective  
52 equipment was reported to elevate the perceived risks to the infection. Respondents belonging in the  
53 oldest age group and from low and mid-level health care facilities had higher proportions with a high-  
54 risk perception of acquiring COVID-19 infection compared to their counterparts.

55 **Conclusions:** Only about half of the HCWs reported to be vaccinated albeit the majority recounted  
56 higher perception of risk to contracting COVID-19 due to their working environment, including  
57 limited availability and use of personal protective equipment. Efforts to address heightened perceived-  
58 risks should include improving the working environment, availability of PPEs and continue updating  
59 HCWs on the benefits of COVID-19 vaccine to limit their risks to the infection and consequent  
60 transmission to their patients and public.

61

## 62 **Introduction**

63 The novel coronavirus disease 2019 (COVID-19) caused by severe acute respiratory syndrome  
64 corona virus 2 (SARs-CoV-2) remains a significant disease of public health concern. Since its  
65 emergence, it has been shown to spread rapidly causing dramatic global health crisis [1] . It  
66 was declared as a pandemic by the World Health Organization (WHO) on the 11th of March  
67 2020, with a total of 56,837,067 confirmed cases, 340,447 new cases and 928,593 confirmed  
68 deaths globally as of January 17, 2022 [2]. Tanzania had reported relatively few number of  
69 COVID 19 cases, with a total of 31,395 confirmed cases and 745 deaths reported between  
70 January 2020 and January 18, 2022 [3].

71 Vaccination is among the most cost-effective ways of preventing diseases. For the vaccination  
72 effect to be appreciated, several strategies to be considered include vaccine availability,  
73 accessibility, acceptability, and willingness of the population to vaccinate. Studies show that  
74 about 14.3 % and 22.1% of the global population intend to refuse vaccination or showed  
75 uncertainty respectively, with higher rates reported in lower income countries [3]. Moreover,  
76 perceived vaccine efficacy and safety concerns contribute to the observed trends in most  
77 countries [4].

78 There was a considerable delay in COVID 19 vaccine roll out in Tanzania, after launching the  
79 first nation-wise COVID 19 vaccination, the first roll out was made available among priority  
80 groups; health care workers (HCWs) with high risk of getting and transmitting the infection,  
81 people with advanced age and underlying medical conditions with a high risk of developing  
82 severe disease [5]. A total of 2,431,769 vaccine doses administered by the end of year 2021  
83 under COVAX facility [3,6]. While vaccine availability may not have been a challenging

84 option initially, the issue of vaccines acceptance and hesitancy influenced by social, political,  
85 and religious factors may contribute to low vaccine uptake.

86 HCWs stand as among the most important groups as trusted influencers in regards to health  
87 issues, including vaccination decisions [7]. This important group should be guided and  
88 supported to provide credible and scientifically proven information on vaccines as their  
89 influence in the community remains pivotal. It is therefore important to understand and  
90 acknowledge HCWs perspectives with regard to COVID 19 vaccines [4]. However, studies  
91 have reported a number of challenges facing this population including high risk of infection,  
92 insufficient personal protective equipment (PPE), heavy workloads and discrimination [8].

93 Risk perception, defined as an individual perceived susceptibility to threat, plays a key role in  
94 health behavioral change theories, including health decision making process [9]. HCWs are  
95 among the most vulnerable groups for SARs-CoV-2 infection, they work in frontline positions  
96 with suspected and confirmed COVID 19 cases, 5-7.3% of HCWs were found to be COVID  
97 19 positive in some developed countries [10,11]. While being a high-risk group, some studies  
98 have reported that perceived risk of COVID 19 infection and detrimental health effects among  
99 HCW are associated positive protective behaviors [12]. In Ethiopia, 88% of HCWs were  
100 reported to perceive their risk of being infected with COVID 19 infection as high, and showed  
101 widespread practice on preventive measures [13].

102 Myths and misconceptions around the COVID 19 vaccine subject have been circulating and its  
103 impact can be observed especially in developing countries [1]. This has been shown to  
104 contribute to the observed vaccine hesitancy, which is defined by WHO as the reluctance in  
105 accepting vaccines or an outright refusal of vaccines despite their availability [7]. WHO has  
106 further mentioned vaccine hesitancy as one of the top global threats to public health in 2019  
107 [7,14]. As reported by a study done in Senegal with 5.5% COVID 19 vaccine coverage, vaccine

108 hesitancy and refusal have contributed to low vaccine uptake despite its multifaceted nature  
109 [15]. In Ethiopia, more than 50% of HCWs were found to be vaccine hesitant [4].

110 While being at an increased risk of COVID 19 infection and disease transmission in Tanzania,  
111 HCWs play an influential role in community understanding and overall vaccine uptake; there  
112 is paucity of data on the status of vaccine uptake among HCWs and the influencing factors in  
113 Tanzania. Understanding HCWs risk perception and their influence on vaccination is crucial  
114 in informing policy makers and highlighting educational needs to address the situation  
115 especially in developing countries like Tanzania. This mixed method study illustrates on HCWs  
116 perceptions in relation to the COVID 19 vaccine uptake situation in Tanzania.

## 117 **Materials and Methods**

### 118 **Study setting**

119 Tanzania is a large East African country with an area of 947,000 square kilometers and an  
120 estimated population of 61.5 million (2021 World Bank projections) of which about two-thirds  
121 live in rural areas. Tanzania comprises of the much larger mainland and semi-autonomous isles  
122 (Zanzibar); the current study was conducted in mainland Tanzania. Mainland Tanzania is  
123 administratively divided into 26 regions, each region comprising of a variable number of  
124 districts (4 – 6), which in turn contain wards. The Tanzanian healthcare delivery facilities  
125 follow this pyramidal administrative arrangement, with regional referral hospitals situated at  
126 the apex, functioning as the highest-level hospital within a region, which receive referrals from  
127 district hospitals, that in turn receive patients from lower levels (health centers and  
128 dispensaries). Groups of regions are further clustered into six geographical zones (Northern,  
129 Coastal, Central, Southern highlands, Western and Lake). One region was randomly selected

130 from each of these six zones to be included in the study. The sampled regions were Kilimanjaro,  
131 Lindi, Njombe, Mbeya, Tabora and Simiyu representing Northern, Coastal, Central, Southern  
132 highlands, Western and Lake zones, respectively. Dar es salaam as a cosmopolitan and the  
133 largest city in Tanzania was also purposefully selected to be included in the study.

## 134 **Study design and participants**

135 A concurrent embedded mixed methods research design was utilized to collect data among  
136 HCWs in seven regions of mainland Tanzania from November 2021 to January 2022. The  
137 qualitative part of the study was embedded in the quantitative cross-sectional study. The  
138 qualitative part was mainly intended to explain the healthcare workers' risk perceptions  
139 towards COVID-19 disease, as a supplement of the quantitative study assessing COVID-19  
140 vaccine hesitancy.

141 A sample size for the quantitative part of the study ( $N = 1400$ ) was determined by using a single  
142 proportion formula taking a standard normal value of 1.96 under the 95% confidence limit,  
143 50% proportion of vaccine hesitancy (for maximization of sample size), 3.5% margin of error,  
144 1.5 design effect to address the clustering effect while adjusting for a non-response rate of 20%.

145 Multi-stage sampling technique was employed to recruit HCWs from the seven (7) selected  
146 regions for the quantitative part. One Regional Referral hospital, two (2) district hospitals and  
147 two (2) health centers from each of the identified regions were included in this study. Therefore,  
148 a total of seven (7) Regional Referral Hospitals, fourteen (14) district hospitals, and fourteen  
149 (14) health centers were included. Systematic sampling technique was used to select healthcare  
150 facilities for inclusion. Sampling of HCWs within the selected health facilities was based on  
151 their number in the selected health facilities in a region proportional to their size. Upon

152 determination of the respective health facilities' sample sizes, HCWs were consecutively  
153 invited to participate and enrolled into the study.

154 The qualitative component of the study was conducted in four of the seven regions where the  
155 quantitative study took place. In-depth interviews were conducted in each region with the key  
156 officials including the Regional Medical Officers, Regional Vaccination Officers, District  
157 Medical officers, District vaccination officers and hospital in charges leading to a total of 26  
158 interviews. Additionally, we conducted two focus group discussions in each region with  
159 participants ranging from 6 – 12 people leading to a total 74 participants in 8 FGDs. The FGDs  
160 engaged health care workers in the selected districts within the study regions.

## 161 **Data collection tools and procedures**

162 Quantitative data was collected using a validated, pre-piloted questionnaire through the Open  
163 Data Kit (ODK). The questionnaires were developed based on various studies and WHO  
164 proposed questions to assess vaccine hesitancy and acceptability [16–21]. The questionnaire  
165 was prepared in English and translated in Swahili and had four components: socio-  
166 demographic, awareness and knowledge on COVID-19 vaccines, risk perception towards  
167 COVID-19 and COVID-19 vaccine acceptance. Back translation to English was done to  
168 preserve the meaning of the questions. The questionnaire was administered face-face by trained  
169 research assistants (RAs). On the day of quantitative data collection, the RAs visited the HCWs,  
170 introduced themselves and explained the study purpose. Then, consent information was  
171 administered in a quiet, private place around the health facility. Special emphasis was placed  
172 on issues of anonymity and confidentiality, and in assuring the respondents that no personal  
173 identifiable information will be collected to encourage truthful responses. Only the consenting  
174 individuals were interviewed.



175 Qualitative data was collected through IDIs and FGDs with purposively selected health  
176 officials and HCWs to explore their opinions and risk perceptions towards COVID-19. All  
177 interviews were conducted in Swahili and audio recorded with the permission of the study  
178 participants. Further, researchers applied the principle of bracketing to ensure that pre-  
179 understanding information do not influence the data [22]. Furthermore, for enhancement of  
180 reliability, field notes as a reflective diary were maintained.

## 181 **Data management and analysis**

182 The collected quantitative data was transferred from the Open Data Kit (ODK) to an excel  
183 spreadsheet. Upon completion of data collection, each questionnaire was assessed for its  
184 completeness. Data entry, cleaning and coding was done using Microsoft Excel program and  
185 exported to Stata software V.16.1 (College Station, Texas). Descriptive analyses were  
186 performed for proportions, percentages, means and their corresponding standard deviations.

187 The primary outcome variable of the study was COVID-19 risk perception which was assessed  
188 by asking a question “How do you perceive the level of risk that you have for acquiring  
189 COVID-19 infection” with responses along a six-point Likert scale ranging from “Not at all”  
190 to “Very high risk”. Thereafter, the responses were dichotomized into a “Low risk” and “High  
191 risk”. Vaccination status of the respondents was assessed by asking “Have you been vaccinated  
192 against COVID-19” with “Yes/No” responses.

193 Age and work experience were recoded into categorical variables. For categorical variables  
194 chi-square test was used to assess associations between sociodemographic characteristics and  
195 COVID-19 vaccination status to Risk perceptions. Statistical significance was defined as a p  
196 value of <0.05.

197 For qualitative data, the audio recorded in-depth interviews and focused group discussions were  
198 transcribed verbatim into word file documents where non-verbal cues were also considered.  
199 The transcription process started within 24 hours after the conduct of the interview to allow  
200 follow-up on issues for more clarity and determination of data saturation in subsequent  
201 interviews and discussions. The transcribed transcripts were checked against the audio records  
202 by two of the research team members to ensure accuracy and quality of the data generated.  
203 Thematic analysis was used to analyze the information following the five stages as described  
204 by Braun and Clarke, 2014 (23) to establish meaningful patterns in the data: familiarization  
205 with the data, generating initial codes, searching for themes among codes, reviewing themes  
206 and presenting the results. The coding also involved identification of the typical quotes that are  
207 used to illustrate the various themes presented in the study.

## 208 **Ethical considerations**

209 Ethical approval was obtained from the Research and Publication Committee of the Muhimbili  
210 University of Health and Allied Sciences (MUHAS-REC-08-2021-839). Permission to collect  
211 data in Regions and Councils was sought from the President's Office Regional Administration  
212 and Local Government, Ministry of Health Community, Development, Gender, Elderly and  
213 Children (MoHCDGEC), Regional Secretariat (RS) and Local Government Authorities  
214 (LGAs). Prior to collection of data, all participants were provided with information on the  
215 purpose of the study, voluntary nature of participation, right to withdraw from study at any  
216 time without consequence and guaranteed anonymity. Signed, informed consent was obtained  
217 from all participants before enrolment into the study.

## 219 Results

220 A total of 1368 health care workers were approached and involved in the quantitative part of  
221 this study. Most of the respondents were female (60.1%) and had the mean age of 35.7 years  
222 (SD 10.1). There was almost an equal representation of participants by regions, except for  
223 Dar es Salaam which contributed the largest proportion (26.1%). Most of the respondents  
224 were from the district-level facilities (42.1%) and about three quarters (77.5%) worked in  
225 Government facilities (Table 1).

226 Table 1: Background characteristics of HCWs (N=1368)

| Variable                | Frequency | Percentage |
|-------------------------|-----------|------------|
| Age (years)             |           |            |
| <30                     | 470       | 34.4       |
| 30-39                   | 483       | 35.3       |
| 40+                     | 415       | 30.3       |
| Sex                     |           |            |
| Male                    | 546       | 39.9       |
| Female                  | 822       | 60.1       |
| Education level         |           |            |
| Primary/Secondary       | 36        | 2.6        |
| Certificate             | 437       | 31.9       |
| Diploma                 | 610       | 44.6       |
| Degree/Masters          | 285       | 20.8       |
| Work experience (years) |           |            |
| <6                      | 731       | 53.4       |
| 6+                      | 637       | 46.6       |
| Region                  |           |            |
| Dar es salaam           | 357       | 26.1       |
| Kilimanjaro             | 187       | 13.7       |

|                            |      |      |
|----------------------------|------|------|
| Lindi                      | 151  | 11.0 |
| Mbeya                      | 186  | 13.6 |
| Njombe                     | 158  | 11.5 |
| Simiyu                     | 137  | 10.0 |
| Tabora                     | 192  | 14.0 |
| Health facility level      |      |      |
| Regional Referral Hospital | 378  | 27.6 |
| District Hospital          | 576  | 42.1 |
| Health center              | 414  | 30.3 |
| Facility ownership         |      |      |
| Government                 | 1060 | 77.5 |
| CDH/DDH                    | 148  | 10.8 |
| Private/NGO                | 160  | 11.7 |

227

228 Only about one half of the HCW (53.6%) reported to have been vaccinated whereas three  
 229 quarters (75.5%) self-perceived to have a high risk of acquiring a COVID-19 infection.  
 230 Accordingly, those that perceived to have a high risk for COVID-19 infection had a larger  
 231 proportion reporting to have been vaccinated for COVID-19 compared to their counterpart (p  
 232 <0.01) (Table 2).

233 Table 2: Vaccination status and risk perception for COVID-19 infection

|                            |      | COVID-19 vaccination Status |               | Total       |
|----------------------------|------|-----------------------------|---------------|-------------|
|                            |      | Unvaccinated                | Vaccinated    |             |
| <b>Risk perception for</b> | Low  | 182 (54.5)                  | 152 (45.5) ** | 334 (24.5)  |
| <b>COVID-19 infection</b>  | High | 451 (43.8)                  | 578 (56.2)    | 1029 (75.5) |
| Total                      |      | 637 (46.6)                  | 730 (53.6)    | 1363 (100)  |

234 \*\* *chi-square p-value < 0.01*

235 The higher perceived risk to COVID 19 infection perceptions were also reported during the  
236 qualitative in-depth interviews and focus group discussions. When detailing the risks to  
237 COVID-19 infections participants voiced that the nature of the work done by HCWs and the  
238 working environment at the health facilities increases their risks to the infection. Limited  
239 availability and use of personal protective equipment's (PPEs) including standard face masks  
240 and sanitizers at the health facilities were mentioned to elevate the perceived risks to the  
241 infection. Some HCWs reported that many times they must attend patients without using any  
242 PPEs because they are frequently unavailable. Others said that the risk to contacting COVID  
243 19 infection is so high because even when the PPEs are available others HCWs do not  
244 comply with their use. One of the district officials when explaining about risks to COVID-19  
245 infection he related it with the working environment as follows:

246 *“the risk to COVID-19 infection among health care workers is high because of the*  
247 *working environment, people have relaxed, they are no longer taking measures against*  
248 *COVID 19, some do not bother to even wear mask, wash hands, keep social distancing*  
249 *and even when masks are there they just don't put on all the time as required, everything*  
250 *about COVID-19 seem to paralyze, no one is either complying or discussing about it,*  
251 *which cause the working environment unsafe (IDI1).*

252 Working in the health facility setting was reported as increasing the risk to contacting the  
253 COVID-19 infection. Participants voiced concerns that it is the HCWs who take care of the  
254 COVID-19 patients that also increase their likelihood of being infected. They said most of the  
255 hospitals for example do not have enough offices/ exchange rooms rather rooms are shared  
256 among HCWs including those that attend patients at the intensive care unit (ICU) or patients  
257 having trouble breathing. The shared rooms are small and limited in space a situation that  
258 increases their risk to COVID-19 infections. When detailing on this matter a participant

259 during the in-depth interviews reported unless compliance to the recommend preventive  
260 measures is high, HCWs will continue to be at higher risk to contacting COVID-19:

261 *“You cannot say health care workers are not at risk of COVID-19 as far as they are*  
262 *working in the hospital, they are taking care of the COVID-19 patients, they share*  
263 *small rooms, no dedicated rooms for those attending patients at the intensive care*  
264 *unit or with difficult breathing, sometimes do not have all the required PPEs so the*  
265 *risk is there and if one gets infected it is likely the rest will experience the same unless*  
266 *compliance to recommendation protective measures is high we will continue to be at*  
267 *higher risk of COVID-19” (IDI3)*

268

269 Participants believed the risk to COVID-19 infection is not only higher for HCWs but also  
270 increased the potential for them to transmit the infection to their patients. They said  
271 sometimes HCWs attend patients before even knowing either they have the infection or the  
272 patient they attend is having the infection due to the resemblances of COVID-19 symptoms  
273 with other diseases. This was elaborated during in-depth interviews by the health facility in-  
274 charge as follows:

275 *“Transmission of the infection is not avoidable ... as long as you attend patients, a chance*  
276 *of acquiring or transmitting it to others still viable. First of all, you may not even be*  
277 *aware that you are COVID-19 positive when attending a patient because COVID*  
278 *symptoms resemble that of other diseases like malaria such as feeling fever, joint pains,*  
279 *cough and so on...and the patient may have same symptoms and you think it is malaria*  
280 *and not COVID-19” (IDI4).*

281

282 On the other hand, ideas that the risk to COVID-19 infection has been reduced with the use of  
 283 COVID-19 vaccinations were also expressed. When explaining on this, participants  
 284 compared the risk to the infection from the first wave when people did not know what to do  
 285 about it with the time when vaccines were introduced:

286 *“The risk to COVID-19 infection was very high like 100% during the first wave*  
 287 *because COVID 19 was a new thing and we had no enough knowledge on the*  
 288 *precautions to take or what to do, but the risk decreased during the second wave*  
 289 *because we had enough knowledge on how this disease is transmitted and how to take*  
 290 *precautions and the risk decreased more and more to the point that we are not that*  
 291 *much worried because there is the introduction of vaccine which has helped us to*  
 292 *build protection” (FGD 3)*

293

294 Table 3: Socio-demographic characteristics by high COVID-19 risk perception and reporting  
 295 being vaccinated for COVID-19

| Variable               | High Risk Perception | <i>p</i> -value | Vaccinated | <i>p</i> -value |
|------------------------|----------------------|-----------------|------------|-----------------|
| <b>Age (years)</b>     |                      |                 |            |                 |
| <30                    | 335 (71.4)           |                 | 187 (39.8) |                 |
| 30-39                  | 350 (72.8)           | .000            | 271 (56.1) | .000            |
| 40+                    | 344 (83.3)           |                 | 273 (65.8) |                 |
| <b>Sex</b>             |                      |                 |            |                 |
| Male                   | 399 (73.5)           | .159            | 292 (53.5) | 1.000           |
| Female                 | 630 (76.8)           |                 | 439 (53.4) |                 |
| <b>Education level</b> |                      |                 |            |                 |
| Primary/Secondary      | 30 (83.3)            |                 | 20 (55.6)  |                 |
| Certificate            | 344 (78.9)           | .083            | 213 (48.7) | .121            |
| Diploma                | 451 (74.4)           |                 | 337 (55.2) |                 |

|                                |             |      |            |      |
|--------------------------------|-------------|------|------------|------|
| Degree/Masters                 | 204 (71.6)  |      | 161 (56.5) |      |
| <b>Work experience (years)</b> |             |      |            |      |
| <6                             | 529 (72.8)  | .012 | 319 (43.6) | .000 |
| 6+                             | 500 (78.6)  |      | 412 (64.7) |      |
| <b>Region</b>                  |             |      |            |      |
| Dar es salaam                  | 211 (59.3)  |      | 177 (49.6) |      |
| Kilimanjaro                    | 146 (78.1)  |      | 114 (61.0) |      |
| Lindi                          | 106 (70.2)  | .000 | 93 (61.6)  | .001 |
| Mbeya                          | 157 (85.3)  |      | 87 (46.8)  |      |
| Njombe                         | 142 (90.4)  |      | 78 (49.4)  |      |
| Simiyu                         | 114 (83.8)  |      | 87 (63.5)  |      |
| Tabora                         | 153 (79.7)  |      | 95 (49.5)  |      |
| <b>Health facility level</b>   |             |      |            |      |
| Regional Referral Hospital     | 262 (69.7)  |      | 174 (46.0) |      |
| District Hospital              | 454 (79.1)  | .004 | 304 (52.8) | .000 |
| Health center                  | 313 (75.8)  |      | 253 (61.1) |      |
| <b>Facility ownership</b>      |             |      |            |      |
| Government                     | 777 (73.5)  |      | 612 (57.7) |      |
| CDH/DDH                        | 121 (81.8)  | .006 | 70 (47.3)  | .000 |
| Private/NGO                    | 1313 (82.9) |      | 49 (30.6)  |      |

296

297 Those respondents belonging in the oldest age group had higher proportions with a high-risk  
 298 perception for acquiring COVID-19 infection compared to the younger age groups. Similarly,  
 299 the proportion of respondents reporting to have been vaccinated for COVID-19 was highest  
 300 within the oldest age group. Risk perception and vaccination status was also shown to vary  
 301 significantly by region of the respondents. Whereas Njombe, Simiyu and Mbeya had more than  
 302 85% of the respondents perceiving their risk as high, those in Dar es Salaam only had about  
 303 60% reporting the same. On the other hand, respondents from Simiyu, Lindi and Kilimanjaro



304 had more that 60% reporting to have been vaccinated compared to other regions which  
305 consistently had less that 50% reporting the same.

306 Respondents from low and mid-level of health care facilities (health centers and district  
307 hospitals, respectively) reported much higher risk perceptions compared to those in high level  
308 facilities (Regional referral hospitals). Equally, respondents in low level facilities had higher  
309 proportions reporting to have been vaccinated compared to those in high level facilities.

310 Respondents working in government facilities had a lower proportion (73.5%) reporting to be  
311 at high-risk compared to those working in faith-based organization, NGOs, and private health  
312 facilities. Contrariwise, those respondents from the government facilities had higher  
313 proportions reporting to have been vaccinated compared to their counterparts.

## 314 **Discussion**

315 This study aimed at exploring HCWs perceptions in relation to the COVID 19 vaccine uptake  
316 to inform policy makers and highlighting targeted educational needs to address the similar  
317 situation especially in developing countries like Tanzania. About a quarter of the HCW  
318 perceived to have a low risk of acquiring a COVID-19 infection. Furthermore, those with  
319 perceived low risk had higher proportions reporting to be unvaccinated for COVID-19.

320 In the current study, majority of the HCWs perceived risk of contracting COVID-19 to be high,  
321 consistent to a recent multi-country study by Dryhust et al. that found equally high levels of  
322 COVID-19 risk perception levels in the countries [24]. Due to the nature of their daily work  
323 activities and physical proximity to potential COVID-19 cases, it was expected that the vast  
324 majority of the HCW in health facilities would consider themselves to be at a heightened risk  
325 for contracting the infection. However, consisted availability of appropriate and required PPEs

326 would have contributed towards allaying some of the perceived risks. To control the spread of  
327 infection, it is crucial that all HCWs become sensitized to the increased risk that they are  
328 subjected to with respect to COVID-19 infection. This may ensure that necessary precautions  
329 and protective measures are adopted by the HCW and respective health facilities to prevent  
330 acquisition of infections, but more importantly, that they not become the source of infection to  
331 the patients and clients that they encounter regularly. High perceived risk of COVID-19 has  
332 largely improved the infection prevention and control behaviors of HCWs as indicated by  
333 studies in Egypt and Ethiopia [25] however, the picture was different in Tanzania where even  
334 though participants reported high perceived risk consistent use of protective gears was not  
335 reinforced, even when they were available.

336 It has been widely reported that high perceived risk of contracting COVID 19 is a significant  
337 predictor of vaccine acceptance. However, current findings reveal that only about a half of the  
338 HCW had been vaccinated- despite sustained efforts to ensure availability and encourage  
339 vaccinations. Thus, the link between the perceived risk of COVID-19 and COVID-19 vaccine  
340 uptake was tenuous in this setting, contrary to some similar studies [26]. One probable  
341 explanation for this could be that a significant proportion of people in Africa consider the  
342 vaccines as unnecessary, and that alternatives to COVID-19 vaccination exist [27]. Many  
343 studies have indicated that when people perceive COVID-19 as a threatening disease, the  
344 demand for a vaccine against the disease would be correspondingly increased. However, this  
345 study has shown that it is not necessarily the case and that other factors, especially vaccine  
346 safety concerns, might outweigh the perceived disease risks when an individual decides  
347 whether or not to accept the vaccine [28]. Informing the public about the safety of a COVID-  
348 19 vaccine should be the focus for health authorities aiming to achieve a high vaccine uptake  
349 especially in Tanzania where other factors including contradicting government stance may  
350 have had an influential role in overall vaccine acceptancy.

351 As expected, this study showed high perceived risk for COVID 19 among older HCW which  
352 correlated with high vaccine uptake. Literature indicate that vaccine hesitancy was more  
353 common among young people than older adults partly due to their lower risk of comorbidities  
354 [29–31]. Further, the observed excess mortality in the elderly population due to COVID-19  
355 may have functioned to make this group feel particularly vulnerable, thus both enhancing their  
356 risk perception and increasing willingness to adopt protective measures. Being male has been  
357 reported to be uniformly associated with lower risk perceptions in many countries, which is  
358 consistent with other risk perception studies [32], a finding which was not corroborated in the  
359 present study. This may be due to the similarity of our participants with respect to the perceived  
360 risk of getting COVID-19 infection. That is, all HCWs have same risk for the infection,  
361 irrespective of their identified sex.

362 The triangulation method used in this study under mixed method design provides a deeper  
363 understanding and contextual insights of the research in question. The key informant interviews  
364 and the focused group discussions complement the quantitative findings. The possible  
365 limitation of conducting a mixed method study is the possibility of introducing Interview bias;  
366 to minimize this, in addition to training, authors provided a common interviewer guide to every  
367 interviewer.

## 368 **Conclusions**

369 While majority of the HCWs perceived to have high risk of contracting COVID-19, only about  
370 a half of respondents reported to be vaccinated. Older age, female gender, working in a district  
371 hospital and a private owned hospital and high perceived risk for COVID-19 were associated  
372 with increased vaccine uptake. With the status of the working environment and constant  
373 exposure to patients, some HCWs perceived their risk of contracting COVID-19 to be

374 unavoidable. However, other HCWs declared the potential role of COVID-19 vaccines in  
375 reducing their risk of infection. Targeted information the public on the beneficial role of  
376 COVID-19 vaccine in reducing transmission risk should be the focus for health authorities to  
377 achieve a high vaccine uptake in Tanzania.

## 378 **Policy implications**

379 A consistent and evidence-based position adopted by the health authorities is an important  
380 prerequisite towards addressing any novel public health emergency. Tackling future public  
381 health emergencies requires deliberate actions to be taken in safeguarding the interests and  
382 wellbeing of the HCWs.

## 383 **Acknowledgments:**

384 The authors acknowledge their corresponding institutions for providing support to conduct the  
385 study. We recognize the cooperation from all the health care workers that took part in this  
386 study. We acknowledge the support from the regional and district medical and vaccine officers  
387 and the health facilities-in charges of the involved health facilities. We thank our research  
388 assistants for their dedication to conduct this study timely, namely Melina Mgongo, Doris  
389 Mbata, Oko Okong'o, Zenaice Aloyce, Martha Joseph, Mtumwa Bakari, Nyanjura Manyama,  
390 Zenais Kiwale, Anastazia Ngowi, Barikiel Panga, Novatus Tesha, Albert Majura, Naike  
391 Nathaniel, Julietha Tibyesiga, Loveness Kimaro, Judith Kokuleba, Ngusa Kalambo,  
392 Constancia F Luyenga, Monica Mtei, Jackline Ngowi, Edson B Jeremiah, Witness Simon,  
393 Erick Kazoka, Chrispin Mgute.

## 394 **References**

- 395 1. Dereje N, Tesfaye A, Tamene B, Alemeshet D, Abe H, Tesfa N, et al. COVID-19 vaccine  
396 hesitancy in Addis Ababa, Ethiopia: a mixed-method study. *BMJ Open*. 2022 May  
397 30;12(5):e052432. doi: 10.1136/bmjopen-2021-052432. PMID: 35636790; PMCID:  
398 PMC9152622.
- 399 2. COVID-19 dashboard [Internet]. [cited 2022 Jan 19]. Available from:  
400 <https://www.gavi.org/covid19/dashboard>
- 401 3. United Republic of Tanzania: WHO Coronavirus Disease (COVID-19) Dashboard With  
402 Vaccination Data | WHO Coronavirus (COVID-19) Dashboard With Vaccination Data  
403 [Internet]. [cited 2022 Jan 19]. Available from: <https://covid19.who.int/region/afro/country/tz>
- 404 4. Angelo AT, Alemayehu DS, Dachew AM. Health care workers intention to accept COVID-19  
405 vaccine and associated factors in southwestern Ethiopia, 2021. *PLoS One*. 2021 Sep  
406 3;16(9):e0257109. doi: 10.1371/journal.pone.0257109. PMID: 34478470; PMCID:  
407 PMC8415602.
- 408 5. WHO SAGE Roadmap For Prioritizing Uses Of COVID-19 Vaccines In The Context Of  
409 Limited Supply [Internet]. [cited 2022 Jan 19]. Available from:  
410 [https://www.who.int/publications/i/item/who-sage-roadmap-for-prioritizing-uses-of-covid-19-](https://www.who.int/publications/i/item/who-sage-roadmap-for-prioritizing-uses-of-covid-19-vaccines-in-the-context-of-limited-supply)  
411 [vaccines-in-the-context-of-limited-supply](https://www.who.int/publications/i/item/who-sage-roadmap-for-prioritizing-uses-of-covid-19-vaccines-in-the-context-of-limited-supply)
- 412 6. Tanzania Publishes First COVID-19 Data in Over a Year. [cited 2022 Jan 20]. Available from:  
413 [https://www.voanews.com/a/africa\\_tanzania-publishes-first-covid-19-data-over-](https://www.voanews.com/a/africa_tanzania-publishes-first-covid-19-data-over-year/6207608.html)  
414 [year/6207608.html](https://www.voanews.com/a/africa_tanzania-publishes-first-covid-19-data-over-year/6207608.html)
- 415 7. WHO. Ten threats to global health in Air pollution and climate change Noncommunicable  
416 diseases. 2019;1–9. Available from: [https://www.who.int/news-room/spotlight/ten-threats-to-](https://www.who.int/news-room/spotlight/ten-threats-to-global-health-in-2019)  
417 [global-health-in-2019](https://www.who.int/news-room/spotlight/ten-threats-to-global-health-in-2019)

- 418 8. Liu Q, Luo D, Haase JE, Guo Q, Wang XQ, Liu S, et al. The experiences of health-care  
419 providers during the COVID-19 crisis in China: a qualitative study. *Lancet Glob Health*. 2020  
420 Jun;8(6):e790-e798. doi: 10.1016/S2214-109X(20)30204-7. Epub 2020 Apr 29. PMID:  
421 32573443; PMCID: PMC7190296.
- 422 9. Ferrer R, Klein WM. Risk perceptions and health behavior. *Curr Opin Psychol*. 2015 Oct  
423 1;5:85-89. doi: 10.1016/j.copsyc.2015.03.012. PMID: 26258160; PMCID: PMC4525709.
- 424 10. Barrett ES, Horton DB, Roy J, Gennaro ML, Brooks A, Tischfield J, et al. Prevalence of  
425 SARS-CoV-2 infection in previously undiagnosed health care workers at the onset of the U.S.  
426 COVID-19 epidemic. *medRxiv [Preprint]*. 2020 Apr 24:2020.04.20.20072470. doi:  
427 10.1101/2020.04.20.20072470. Update in: *BMC Infect Dis*. 2020 Nov 16;20(1):853. PMID:  
428 32511600; PMCID: PMC7276027.
- 429 11. Sikkema RS, Pas SD, Nieuwenhuijse DF, O'Toole Á, Verweij J, van der Linden A, et al.  
430 COVID-19 in health-care workers in three hospitals in the south of the Netherlands: a cross-  
431 sectional study. *Lancet Infect Dis*. 2020 Nov;20(11):1273-1280. doi: 10.1016/S1473-  
432 3099(20)30527-2. Epub 2020 Jul 2. Erratum in: *Lancet Infect Dis*. 2020 Sep;20(9):e215.  
433 PMID: 32622380; PMCID: PMC7332281.
- 434 12. Liao Q, Wu P, Wing Tak Lam W, Cowling BJ, Fielding R. Trajectories of public psycho-  
435 behavioural responses relating to influenza A(H7N9) over the winter of 2014-15 in Hong  
436 Kong. *Psychol Health*. 2019 Feb;34(2):162-180. doi: 10.1080/08870446.2018.1515436. Epub  
437 2018 Nov 15. PMID: 30430862.
- 438 13. Deressa W, Worku A, Abebe W, Gizaw M, Amogne W. Risk perceptions and preventive  
439 practices of COVID-19 among healthcare professionals in public hospitals in Addis Ababa,  
440 Ethiopia. *PLoS One*. 2021 Jun 25;16(6):e0242471. doi: 10.1371/journal.pone.0242471. PMID:  
441 34170910; PMCID: PMC8232450.
- 442 14. Graffigna G, Palamenghi L, Boccia S, Barello S. Relationship between Citizens' Health  
443 Engagement and Intention to Take the COVID-19 Vaccine in Italy: A Mediation Analysis.

- 444 Vaccines (Basel). 2020 Oct 1;8(4):576. doi: 10.3390/vaccines8040576. PMID: 33019663;  
445 PMCID: PMC7711984.
- 446 15. Ba MF, Faye A, Kane B, Diallo AI, Junot A, Gaye I, et al. Factors associated with COVID-19  
447 vaccine hesitancy in Senegal: A mixed study. *Hum Vaccin Immunother*. 2022 Nov  
448 30;18(5):2060020. doi: 10.1080/21645515.2022.2060020. Epub 2022 May 11. PMID:  
449 35543616.
- 450 16. Kanu S, James PB, Bah AJ, Kabba JA, Kamara MS, Williams CEE, et al. Healthcare Workers'  
451 Knowledge, Attitude, Practice and Perceived Health Facility Preparedness Regarding COVID-  
452 19 in Sierra Leone. *J Multidiscip Healthc*. 2021 Jan 11;14:67-80. doi:  
453 10.2147/JMDH.S287156. PMID: 33469299; PMCID: PMC7810694.
- 454 17. Fares S, Elmnyer MM, Mohamed SS, Elsayed R. COVID-19 Vaccination Perception and  
455 Attitude among Healthcare Workers in Egypt. *J Prim Care Community Health*. 2021 Jan-  
456 Dec;12:21501327211013303. doi: 10.1177/21501327211013303. PMID: 33913365; PMCID:  
457 PMC8111272.
- 458 18. Detoc M, Bruel S, Frappe P, Tardy B, Botelho-Nevers E, Gagneux-Brunon A. Intention to  
459 participate in a COVID-19 vaccine clinical trial and to get vaccinated against COVID-19 in  
460 France during the pandemic. *Vaccine*. 2020 Oct 21;38(45):7002-7006. doi:  
461 10.1016/j.vaccine.2020.09.041. Epub 2020 Sep 17. PMID: 32988688; PMCID: PMC7498238.
- 462 19. Seale H, Heywood AE, Leask J, Sheel M, Durrheim DN, Bolsewicz K, et al. Examining  
463 Australian public perceptions and behaviors towards a future COVID-19 vaccine. *BMC Infect*  
464 *Dis*. 2021 Jan 28;21(1):120. doi: 10.1186/s12879-021-05833-1. PMID: 33509104; PMCID:  
465 PMC7840792.
- 466 20. Sallam M, Dababseh D, Eid H, Al-Mahzoum K, Al-Haidar A, Taim D, et al. High Rates of  
467 COVID-19 Vaccine Hesitancy and Its Association with Conspiracy Beliefs: A Study in Jordan  
468 and Kuwait among Other Arab Countries. *Vaccines (Basel)*. 2021 Jan 12;9(1):42. doi:  
469 10.3390/vaccines9010042. PMID: 33445581; PMCID: PMC7826844.

- 470 21. Ciardi F, Menon V, Jensen JL, Shariff MA, Pillai A, Venugopal U, et al. Knowledge, Attitudes  
471 and Perceptions of COVID-19 Vaccination among Healthcare Workers of an Inner-City  
472 Hospital in New York. *Vaccines (Basel)*. 2021 May 17;9(5):516. doi:  
473 10.3390/vaccines9050516. PMID: 34067743; PMCID: PMC8156250.
- 474 22. Creswell JW, Poth CN. *Qualitative Inquiry and Research Design: Choosing among five*  
475 *approaches*. SAGE Publications; 2016.
- 476 23. Braun V, Clarke V. What can "thematic analysis" offer health and wellbeing researchers? *Int J*  
477 *Qual Stud Health Well-being*. 2014 Oct 16;9:26152. doi: 10.3402/qhw.v9.26152. PMID:  
478 25326092; PMCID: PMC4201665.
- 479 24. Sarah Dryhurst, Claudia R. Schneider, John Kerr, Alexandra L. J. Freeman, Gabriel Recchia,  
480 Anne Marthe van der Bles, David Spiegelhalter & Sander van der Linden. Risk perceptions of  
481 COVID-19 around the world, *Journal of Risk Research*. 2020; 23:7-8, 994-1006, DOI:  
482 10.1080/13669877.2020.1758193
- 483 25. Abdel Wahed WY, Hefzy EM, Ahmed MI, Hamed NS. Assessment of Knowledge, Attitudes,  
484 and Perception of Health Care Workers Regarding COVID-19, A Cross-Sectional Study from  
485 Egypt. *J Community Health*. 2020 Dec;45(6):1242-1251. doi: 10.1007/s10900-020-00882-0.  
486 PMID: 32638199; PMCID: PMC7340762.
- 487 26. Solís Arce JS, Warren SS, Meriggi NF, Scacco A, McMurry N, Voors M, et al. COVID-19  
488 vaccine acceptance and hesitancy in low- and middle-income countries. *Nat Med*. 2021  
489 Aug;27(8):1385-1394. doi: 10.1038/s41591-021-01454-y. Epub 2021 Jul 16. PMID:  
490 34272499; PMCID: PMC8363502.
- 491 27. Anjorin AA, Odetokun IA, Abioye AI, Elnadi H, Umoren MV, Damaris BF, et al. Will  
492 Africans take COVID-19 vaccination? *PLoS One*. 2021 Dec 1;16(12):e0260575. doi:  
493 10.1371/journal.pone.0260575. PMID: 34851998; PMCID: PMC8635331.
- 494 28. Karlsson LC, Soveri A, Lewandowsky S, Karlsson L, Karlsson H, Nolvi S, et al. Fearing the



- 495 disease or the vaccine: The case of COVID-19. *Pers Individ Dif*. 2021 Apr;172:110590. doi:  
496 10.1016/j.paid.2020.110590. Epub 2020 Dec 14. PMID: 33518869; PMCID: PMC7832025.
- 497 29. Anjorin AA, Abioye AI, Asowata OE, Soipe A, Kazeem MI, Adesanya IO, et al.  
498 Comorbidities and the COVID-19 pandemic dynamics in Africa. *Trop Med Int Health*. 2021  
499 Jan;26(1):2-13. doi: 10.1111/tmi.13504. Epub 2020 Oct 23. PMID: 33012053; PMCID:  
500 PMC7675305.
- 501 30. Abayomi A, Osibogun A, Kanma-Okafor O, Idris J, Bowale A, Wright O, Adebayo B, et al.  
502 Morbidity and mortality outcomes of COVID-19 patients with and without hypertension in  
503 Lagos, Nigeria: a retrospective cohort study. *Glob Health Res Policy*. 2021 Jul 29;6(1):26. doi:  
504 10.1186/s41256-021-00210-6. Erratum in: *Glob Health Res Policy*. 2021 Aug 13;6(1):28.  
505 PMID: 34325747; PMCID: PMC8319704.
- 506 31. Diop BZ, Ngom M, Poug   Biyong C, Poug   Biyong JN. The relatively young and rural  
507 population may limit the spread and severity of COVID-19 in Africa: a modelling study. *BMJ*  
508 *Glob Health*. 2020 May;5(5):e002699. doi: 10.1136/bmjgh-2020-002699. Erratum in: *BMJ*  
509 *Glob Health*. 2020 Jul;5(7): PMID: 32451367; PMCID: PMC7252974.
- 510 32. Finucane, M.L., Alhakami, A., Slovic, P. and Johnson, S.M. The affect heuristic in judgments  
511 of risks and benefits. *J. Behav. Decis. Making*. 2000; 13: 1-  
512 17. [https://doi.org/10.1002/\(SICI\)1099-0771\(200001/03\)13:1<1::AID-BDM333>3.0.CO;2-S](https://doi.org/10.1002/(SICI)1099-0771(200001/03)13:1<1::AID-BDM333>3.0.CO;2-S)
- 513
